# Supplementary material for: Genome-Wide Functional Profiling Reveals Genes Required for Tolerance to Benzene Metabolites in Yeast
Source: PLOS journal article supplement (doi:10.1371/journal.pone.0024205), 2011-08-30
Supplement: S1 (10.1371/journal.pone.0024205.s001) [file journal.pone.0024205.s001]

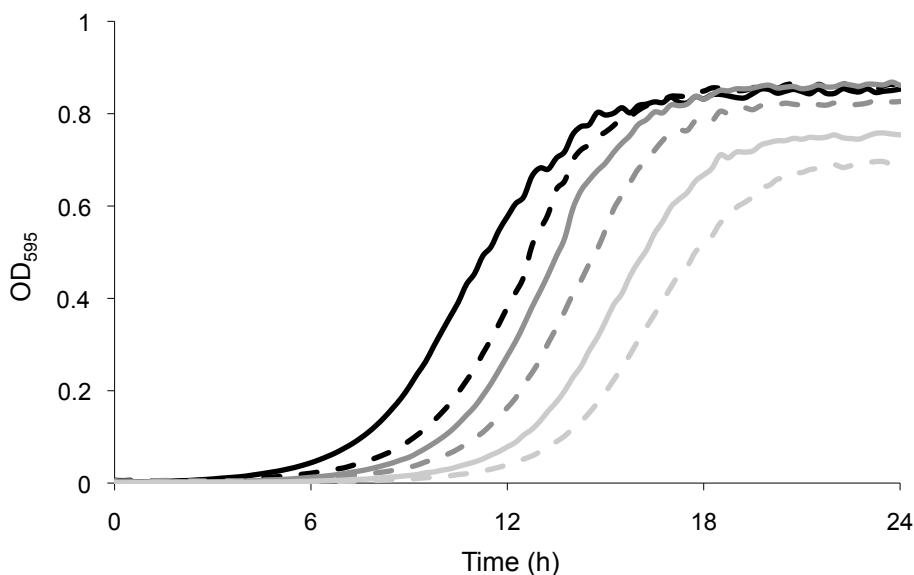

— 0mM HQ      — 4mM HQ      — 8mM HQ  
 - - 2mM HQ      - - 6mM HQ      - - 10mM HQ

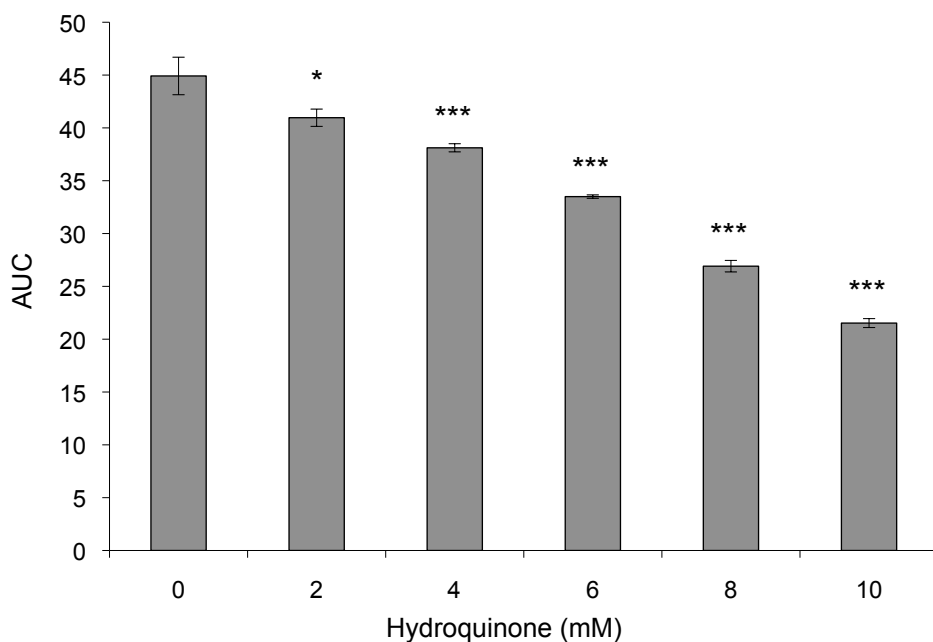

\*\*\*  $p < 0.001$  ; \*  $0.01 < p < 0.05$

**Figure S1. Dose determination of hydroquinone (HQ) for parallel analysis studies.** Growth curve assay for BY4743 wild type treated with increasing concentrations of HQ in YPD media. Measurements of the optical density at 595nm were taken at 15-minute intervals, with each point in the curve representing the average of three replicate measurements in the microplate. Standard error was omitted from the graph for clarity. Total cell growth in 24h was determined by calculating the area under the curve (AUC) for each of the growth curves. The selected exposures concentrations were 1,2 and 4mM HQ.
