# Supplementary material for: Genome-Wide Functional Profiling Reveals Genes Required for Tolerance to Benzene Metabolites in Yeast
Source: PLOS journal article supplement (doi:10.1371/journal.pone.0024205), 2011-08-30
Supplement: S3 (10.1371/journal.pone.0024205.s003) [file journal.pone.0024205.s003]

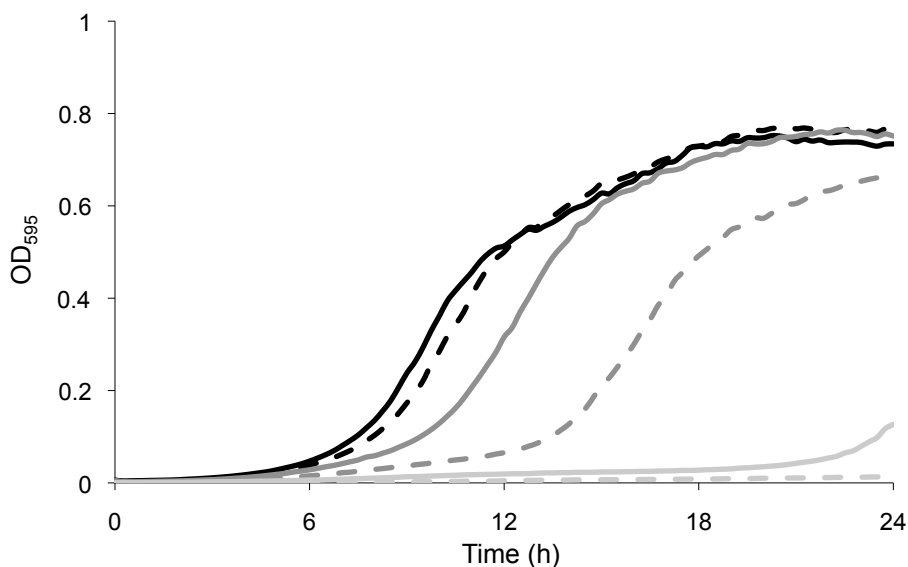

— 0mM BT      — 0.4mM BT      — 0.8mM BT  
 - - 0.2mM BT      - - 0.6mM BT      - - 1mM BT

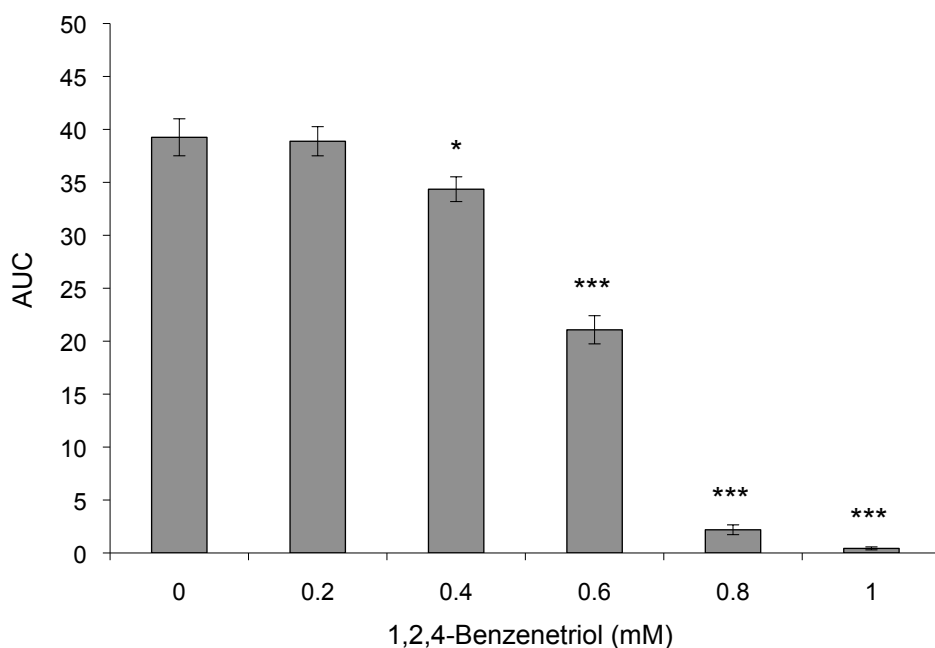

\*\*\*  $p < 0.001$  ; \*  $0.01 < p < 0.05$

**Figure S3. Dose determination of 1,2,4-benzenetriol (BT) for parallel analysis studies.** Growth curve assay for BY4743 wild type treated with increasing concentrations of BT in YPD media. Measurements of the optical density at 595nm were taken at 15-minute intervals, with each point in the curve representing the average of three replicate measurements in the microplate. Standard error was omitted from the graph for clarity. Total cell growth in 24h was determined by calculating the area under the curve (AUC) for each of the growth curves. The selected exposures concentrations were 87.5, 175 and 350 $\mu$ M BT.
