# Supplementary material for: Genome-Wide Functional Profiling Reveals Genes Required for Tolerance to Benzene Metabolites in Yeast
Source: PLOS journal article supplement (doi:10.1371/journal.pone.0024205), 2011-08-30
Supplement: S4 (10.1371/journal.pone.0024205.s004) [file journal.pone.0024205.s004]

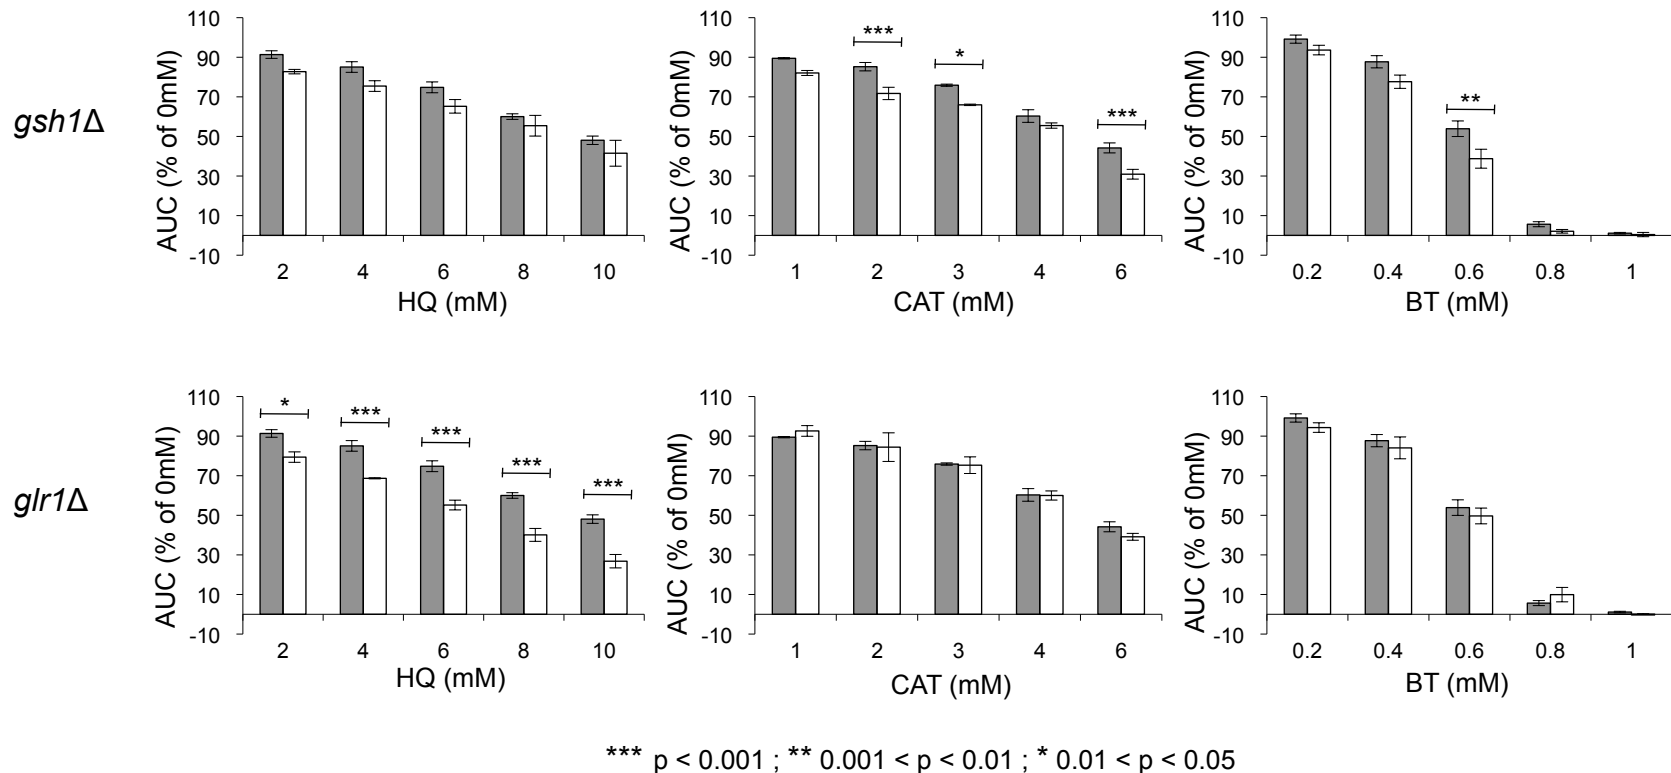

**Figure S4. Growth curve analysis of glutathione pathway mutants.** The AUC was calculated for each strain after 24h of exposure to the indicated doses of HQ, CAT and BT. The bars represent mean AUC as a percentage of the untreated for each strain with standard error of three replicates. Sensitivity was determined by comparison to the wild type strain (gray bars = wild type; white bars = indicated deletion strain). There is no significant requirement for the glutaredoxin pathway for tolerance of any of the metabolites tested at the IC<sub>20</sub> dose, although *glr1Δ* is moderately sensitive to HQ, and *gsh1Δ* shows some sensitivity to both CAT and BT.
