# Supplementary material for: Genome-Wide Functional Profiling Reveals Genes Required for Tolerance to Benzene Metabolites in Yeast
Source: PLOS journal article supplement (doi:10.1371/journal.pone.0024205), 2011-08-30
Supplement: S5 (10.1371/journal.pone.0024205.s005) [file journal.pone.0024205.s005]

*aft1*Δ

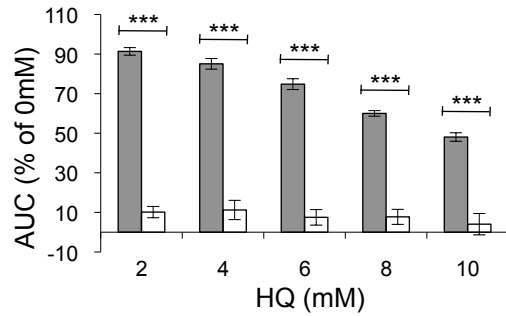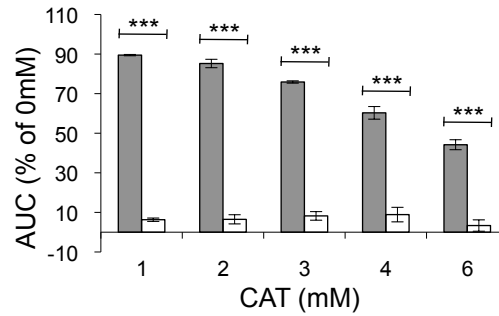

Not  
assessed

*cup5*Δ

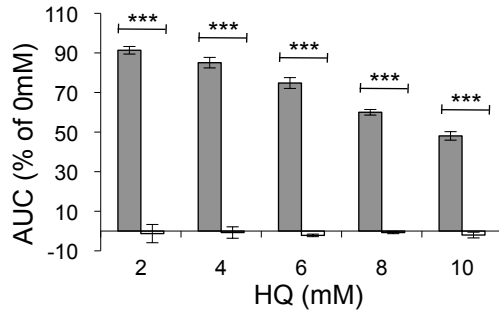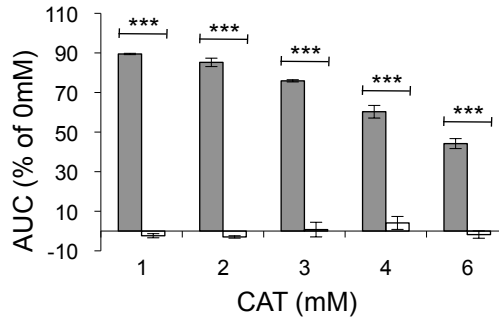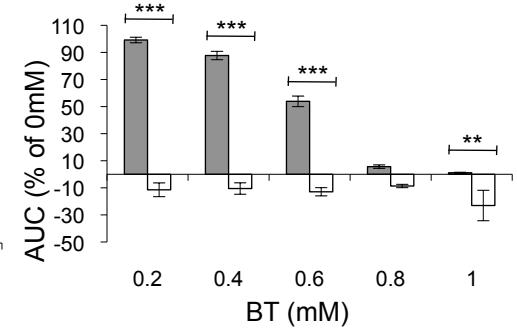

\*\*\* p < 0.001 ; \*\* 0.001 < p < 0.01

**Figure S5. Growth curve analysis of iron homeostasis mutants.** The AUC was calculated for each strain after 24h of exposure to the indicated doses of HQ, CAT and BT. The bars represent mean AUC as a percentage of the untreated for each strain with standard error of three replicates. Sensitivity was determined by comparison to the wild type strain (gray bars = wild type; white bars = indicated deletion strain). Both *aft1*Δ and *cup5*Δ are extremely sensitive to HQ, CAT and BT. The negative AUC values for *cup5*Δ treated with BT are due to the slow growth (and so low AUC values) of *cup5*Δ combined with the absorbance at 595nm of a BT-derived compound. It was not possible to assess *aft1*Δ when treated with BT, due to insufficient growth of an untreated control to use for normalization. However, no growth of *aft1*Δ was ever seen following BT treatment at any dose.
