# Supplementary material for: Genome-Wide Functional Profiling Reveals Genes Required for Tolerance to Benzene Metabolites in Yeast
Source: PLOS journal article supplement (doi:10.1371/journal.pone.0024205), 2011-08-30
Supplement: S6 (10.1371/journal.pone.0024205.s006) [file journal.pone.0024205.s006]

*rfs1Δ*

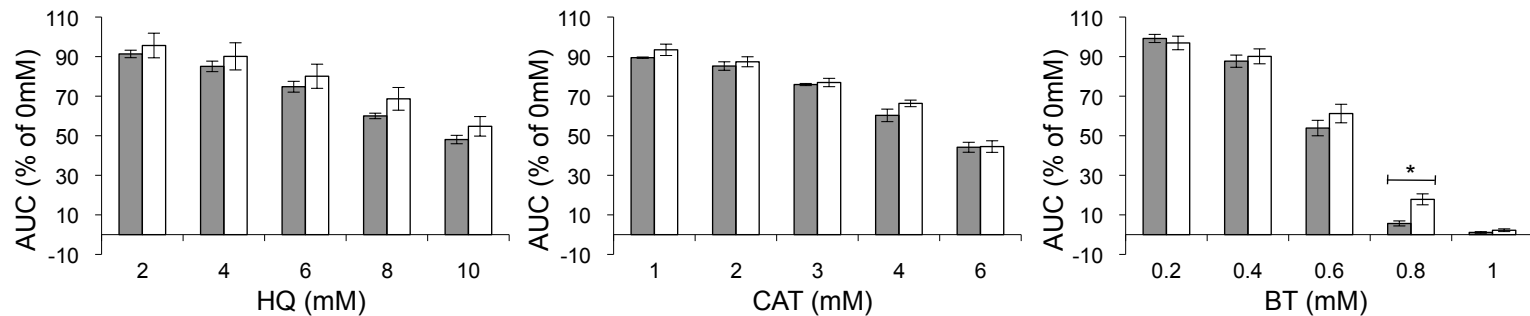

*lot6Δ*

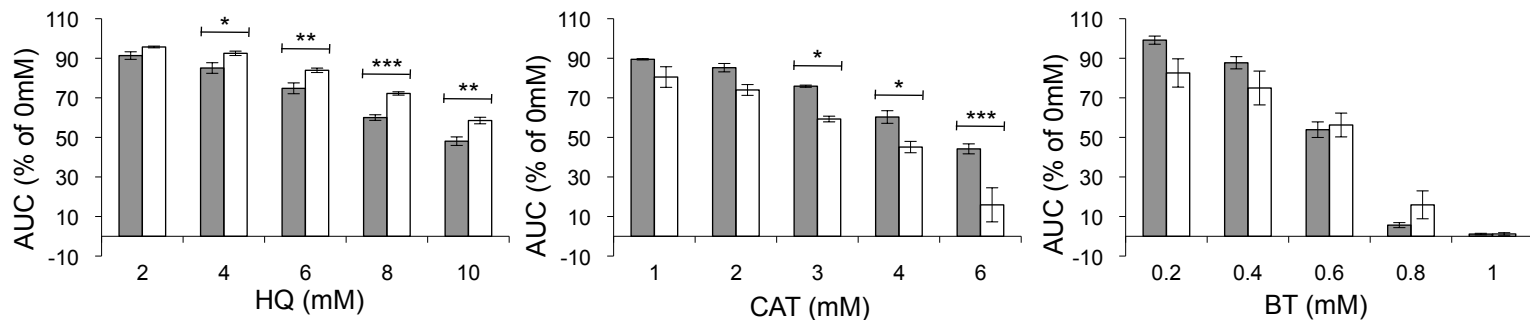

\*\*\*  $p < 0.001$  ; \*\*  $0.001 < p < 0.01$  ; \*  $0.01 < p < 0.05$

**Figure S6. Growth curve analysis of *rfs1Δ* and *lot6Δ*.** The AUC was calculated for each strain after 24h of exposure to the indicated doses of HQ, CAT and BT. The bars represent mean AUC as a percentage of the untreated for each strain with standard error of three replicates. Sensitivity was determined by comparison to the wild type strain (gray bars = wild type; white bars = indicated deletion strain). Deletion of *RFS1* has no effect on HQ, CAT or BT tolerance. The sensitivity of *lot6Δ* to CAT suggests that Lot6p may reduce the quinone form of CAT (1,2-BT) *in vivo*.
