# Supplementary material for: Genome-Wide Functional Profiling Reveals Genes Required for Tolerance to Benzene Metabolites in Yeast
Source: PLoS One. 2011 Aug 30;6(8):e24205. doi: 10.1371/journal.pone.0024205 (PMC3166172; doi:10.1371/journal.pone.0024205)
Supplement: Table S5 — Complete results of network clustering analysis at 5 generations. 19 sub-networks (clusters) were identified at 5 g. The four most significantly enriched GO Biological Processes are shown for each network. (XLS) [file pone.0024205.s011.xls]

## Sheet: 5g STRING clusters
Table S5. Complete results of network clustering analysis at 5 generations. 19 sub-networks (clusters) were identified at 5g. The four most significantly enriched GO Biological Processes are shown for each network.
Network no. = 1
BT	AFT1	GRX3
GO.ID	Term			Annotated	Significant	Expected	classicFisher
GO:0006826	iron ion transport			19	1	0.01	0.0083
GO:0045454	cell redox homeostasis			23	1	0.01	0.0101
GO:0015674	di-, tri-valent inorganic cation transpo...			29	1	0.01	0.0127
GO:0006879	cellular iron ion homeostasis			30	1	0.01	0.0132
Network no. = 2
BT	NAT1	YPL035C	ARO2	CST9	YEL007W	BMH1	RTG2	TFP1	ATP2	GLN3	SCS7	SAM1	RPH1
CAT	VMA5	VMA8	TFP1
GO.ID	Term			Annotated	Significant	Expected	classicFisher
GO:0060255	regulation of macromolecule metabolic pr...			947	45	21.88	2.1e-07
GO:0080090	regulation of primary metabolic process			960	45	22.18	3.2e-07
GO:0065007	biological regulation			1643	63	37.97	4.3e-07
GO:0019222	regulation of metabolic process			1018	46	23.52	6.5e-07
Network no. = 3
BT	TFP1	ATP2
CAT	CUP5	VMA21	PPA1
GO.ID	Term			Annotated	Significant	Expected	classicFisher
GO:0015985	energy coupled proton transport, down el...			30	5	0.04	5.3e-11
GO:0015986	ATP synthesis coupled proton transport			30	5	0.04	5.3e-11
GO:0006818	hydrogen transport			35	5	0.05	1.2e-10
GO:0015992	proton transport			35	5	0.05	1.2e-10
Network no. = 4
CAT	YLR278C	ARO9
GO.ID	Term			Annotated	Significant	Expected	classicFisher
GO:0009072	aromatic amino acid family metabolic pro...			20	1	0.01	0.0088
GO:0006725	cellular aromatic compound metabolic pro...			120	1	0.05	0.0521
GO:0006520	cellular amino acid metabolic process			218	1	0.1	0.0937
GO:0044106	cellular amine metabolic process			235	1	0.1	0.1008
Network no. = 5
CAT	GID8	YDL176W
GO.ID	Term			Annotated	Significant	Expected	classicFisher
GO:0007089	traversing start control point of mitoti...			6	1	0	0.0026
GO:0045721	negative regulation of gluconeogenesis			9	1	0	0.004
GO:0010677	negative regulation of cellular carbohyd...			12	1	0.01	0.0053
GO:0045912	negative regulation of carbohydrate meta...			12	1	0.01	0.0053
Network no. = 6
BT	GLN3	SCS7
CAT	VPH2	VMA22	APL1	APS2
HQ	URE2	TOR1
GO.ID	Term			Annotated	Significant	Expected	classicFisher
GO:0006886	intracellular protein transport			304	11	2.21	5.1e-06
GO:0034613	cellular protein localization			343	11	2.49	1.6e-05
GO:0046907	intracellular transport			578	14	4.2	2e-05
GO:0070727	cellular macromolecule localization			356	11	2.59	2.3e-05
Network no. = 7
CAT	VPS45	PEP7	RCY1	YPT31	VPS3	VPS16	VPS41	PDR16	SYS1
HQ	SEC22	SSO2
GO.ID	Term			Annotated	Significant	Expected	classicFisher
GO:0048193	Golgi vesicle transport			175	35	2	< 1e-30
GO:0016192	vesicle-mediated transport			354	42	4.05	< 1e-30
GO:0051649	establishment of localization in cell			623	43	7.13	2.4e-29
GO:0006944	cellular membrane fusion			74	23	0.85	4.4e-29
Network no. = 8
BT	ARO2	CST9	YEL007W	BMH1	RTG2	GLN3	SCS7	SKG3	GSM1	SKN7	TRX2
CAT	VPS9	VPS21	VPS3	VPS16	VPS41	SKN7	TRX2	APL1	APS2
HQ	YAK1	NPR1	YCK1	MSN2
GO.ID	Term			Annotated	Significant	Expected	classicFisher
GO:0007033	vacuole organization			56	17	2.07	5.6e-12
GO:0016192	vesicle-mediated transport			354	41	13.09	1.2e-11
GO:0006944	cellular membrane fusion			74	17	2.74	7.4e-10
GO:0061025	membrane fusion			74	17	2.74	7.4e-10
Network no. = 9
HQ	CYT2	NNT1
GO.ID	Term			Annotated	Significant	Expected	classicFisher
GO:0017004	cytochrome complex assembly			5	1	0	0.0022
GO:0000183	chromatin silencing at rDNA			19	1	0.01	0.0083
GO:0009636	response to toxin			20	1	0.01	0.0088
GO:0006769	nicotinamide metabolic process			43	1	0.02	0.0188
Network no. = 10
BT	ARO2	CST9	YEL007W	BMH1	RTG2	GLN3	SCS7
CAT	VPS9	VPS21	VPS3	VPS16	VPS41	APL1	APS2
HQ	SNF1	HFA1
GO.ID	Term			Annotated	Significant	Expected	classicFisher
GO:0007033	vacuole organization			56	12	1.22	1.5e-09
GO:0016192	vesicle-mediated transport			354	27	7.71	3.5e-09
GO:0006810	transport			1109	47	24.16	3.9e-07
GO:0008361	regulation of cell size			108	13	2.35	4.2e-07
Network no. = 11
BT	ARO2	CST9	YEL007W	SKN7	TRX2
CAT	SKN7	TRX2
HQ	SKN7	TRX2
GO.ID	Term			Annotated	Significant	Expected	classicFisher
GO:0009263	deoxyribonucleotide biosynthetic process			8	2	0.01	5.7e-05
GO:0009262	deoxyribonucleotide metabolic process			9	2	0.01	7.3e-05
GO:0016925	protein sumoylation			13	2	0.02	0.00016
GO:0006979	response to oxidative stress			70	2	0.11	0.00467
Network no. = 12
BT	BMH1	RTG2
CAT	VPS9	VPS21
HQ	SHO1	SRX1	PEX14
GO.ID	Term			Annotated	Significant	Expected	classicFisher
GO:0007232	osmosensory signaling pathway via Sho1 o...			5	3	0.03	2.3e-06
GO:0007231	osmosensory signaling pathway			22	4	0.14	9e-06
GO:0071214	cellular response to abiotic stimulus			23	4	0.15	1.1e-05
GO:0071470	cellular response to osmotic stress			23	4	0.15	1.1e-05
Network no. = 13
BT	BMH1	RTG2
CAT	YGR130C	YCP4	APL1	APS2
HQ	YGR130C	YCP4
GO.ID	Term			Annotated	Significant	Expected	classicFisher
GO:0051439	regulation of ubiquitin-protein ligase a...			5	2	0.01	6.4e-05
GO:0031400	negative regulation of protein modificat...			6	2	0.02	9.5e-05
GO:0051438	regulation of ubiquitin-protein ligase a...			7	2	0.02	0.00013
GO:0001402	signal transduction during filamentous g...			8	2	0.02	0.00018
Network no. = 14
HQ	REC107	NAM8	MEI4
GO.ID	Term			Annotated	Significant	Expected	classicFisher
GO:0007127	meiosis I			82	2	0.05	0.00095
GO:0006310	DNA recombination			141	2	0.09	0.00281
GO:0050684	regulation of mRNA processing			5	1	0	0.0033
GO:0007126	meiosis			178	2	0.12	0.00446
Network no. = 15
CAT	PDR16	SYS1
HQ	PDR16	SYS1
GO.ID	Term			Annotated	Significant	Expected	classicFisher
GO:0043001	Golgi to plasma membrane protein transpo...			5	1	0	0.0022
GO:0006895	Golgi to endosome transport			12	1	0.01	0.0053
GO:0015914	phospholipid transport			18	1	0.01	0.0079
GO:0006893	Golgi to plasma membrane transport			29	1	0.01	0.0127
Network no. = 16
BT	ARO2	CST9	YEL007W	BMH1	RTG2	GLN3	SCS7	SAM1	RPH1
CAT	VPS9	VPS21	VPS3	VPS16	VPS41
HQ	HRD1	THR4	OYE2
GO.ID	Term			Annotated	Significant	Expected	classicFisher
GO:0007033	vacuole organization			56	12	1.32	3.7e-09
GO:0065007	biological regulation			1643	66	38.69	5e-08
GO:0031497	chromatin assembly			35	9	0.82	6.7e-08
GO:0006334	nucleosome assembly			29	8	0.68	2.1e-07
Network no. = 17
CAT	VPS9	VPS21
HQ	OCA1	OCA2	SIW14	OCA5
GO.ID	Term			Annotated	Significant	Expected	classicFisher
GO:0006623	protein targeting to vacuole			61	3	0.13	0.00026
GO:0006897	endocytosis			93	3	0.2	0.0009
GO:0007264	small GTPase mediated signal transductio...			107	3	0.24	0.00135
GO:0007034	vacuolar transport			113	3	0.25	0.00158
Network no. = 18
BT	ARO2	CST9	YEL007W	SAM1	RPH1	SKN7	TRX2
CAT	SKN7	TRX2
HQ	KGD1	KGD2
GO.ID	Term			Annotated	Significant	Expected	classicFisher
GO:0043648	dicarboxylic acid metabolic process			21	3	0.08	6.6e-05
GO:0009263	deoxyribonucleotide biosynthetic process			8	2	0.03	0.00041
GO:0009262	deoxyribonucleotide metabolic process			9	2	0.04	0.00052
GO:0045935	positive regulation of nucleobase, nucle...			183	5	0.72	0.00056
Network no. = 19
CAT	VPS45	PEP7	VPS9	VPS21	RCY1	YPT31	VPS3	VPS16	VPS41
HQ	PEP12	YIP5
GO.ID	Term			Annotated	Significant	Expected	classicFisher
GO:0016192	vesicle-mediated transport			354	30	3.04	1.9e-26
GO:0006944	cellular membrane fusion			74	19	0.64	4.8e-25
GO:0061025	membrane fusion			74	19	0.64	4.8e-25
GO:0048193	Golgi vesicle transport			175	21	1.5	2e-20
