# Supplementary material for: Genome-Wide Functional Profiling Reveals Genes Required for Tolerance to Benzene Metabolites in Yeast
Source: PLoS One. 2011 Aug 30;6(8):e24205. doi: 10.1371/journal.pone.0024205 (PMC3166172; doi:10.1371/journal.pone.0024205)
Supplement: Table S6 — Complete results of network clustering analysis at 15 generations. 41 sub-networks (clusters) were identified at 15 g. The four most significantly enriched GO Biological Processes are shown for each network. (XLS) [file pone.0024205.s012.xls]

## Sheet: 15g STRING clusters
Table S6. Complete results of network clustering analysis at 15 generations. 41 sub-networks (clusters) were identified at 15g. The four most significantly enriched GO Biological Processes are shown for each network.
Network no. = 1
BT	TIM18	DIC1
GO.ID	Term			Annotated	Significant	Expected	classicFisher
GO:0055085	transmembrane transport			251	2	0.11	0.003
GO:0045039	protein import into mitochondrial inner ...			9	1	0	0.004
GO:0006817	phosphate transport			10	1	0	0.0044
GO:0046685	response to arsenic			11	1	0	0.0048
Network no. = 2
BT	BMH1	RCN2	ADE16	SNF7	VPS24	BRO1	UBP3	ZEO1	ABP1	HUA2	PAC11	UFD4	ILV6
CAT	BUL1	ROG1
GO.ID	Term			Annotated	Significant	Expected	classicFisher
GO:0019941	modification-dependent protein catabolic...			227	26	5	9.5e-13
GO:0051603	proteolysis involved in cellular protein...			235	26	5.17	2.2e-12
GO:0043632	modification-dependent macromolecule cat...			245	26	5.39	5.7e-12
GO:0044257	cellular protein catabolic process			332	29	7.31	3.6e-11
Network no. = 3
BT	SAP155	SDS23	SNF4	HRK1	ROD1	RED1	MEK1
CAT	SAP155	SDS23	PPZ2
GO.ID	Term			Annotated	Significant	Expected	classicFisher
GO:0006796	phosphate metabolic process			308	10	1.83	5.3e-06
GO:0006793	phosphorus metabolic process			313	10	1.86	6.1e-06
GO:0006468	protein amino acid phosphorylation			134	7	0.8	9e-06
GO:0050801	ion homeostasis			136	7	0.81	9.9e-06
Network no. = 4
BT	NFI1	ECM11
CAT	SNF11	ITT1
GO.ID	Term			Annotated	Significant	Expected	classicFisher
GO:0006338	chromatin remodeling			73	2	0.08	0.0025
GO:0032984	macromolecular complex disassembly			94	2	0.1	0.0041
GO:0034623	cellular macromolecular complex disassem...			94	2	0.1	0.0041
GO:0022411	cellular component disassembly			97	2	0.11	0.0043
Network no. = 5
BT	GZF3	GAP1	DAL80	PSY3
CAT	DAL82	DAL81
GO.ID	Term			Annotated	Significant	Expected	classicFisher
GO:0019740	nitrogen utilization			14	3	0.02	8.1e-07
GO:0006808	regulation of nitrogen utilization			9	2	0.01	7.3e-05
GO:0006351	transcription, DNA-dependent			581	5	0.9	0.00057
GO:0032774	RNA biosynthetic process			583	5	0.9	0.00057
Network no. = 6
BT	UBP3	ZEO1
CAT	PDR16	SYS1
GO.ID	Term			Annotated	Significant	Expected	classicFisher
GO:0016050	vesicle organization			71	2	0.08	0.0023
GO:0042493	response to drug			104	2	0.11	0.005
GO:0006195	purine nucleotide catabolic process			5	1	0.01	0.0055
GO:0009143	nucleoside triphosphate catabolic proces...			5	1	0.01	0.0055
Network no. = 7
BT	HOG1	PTP3	PTP2	NAT1	NAT5	GET3	GET2	FAR11	SNT2	RLM1	KDX1
CAT	GPA2	RGS2
GO.ID	Term			Annotated	Significant	Expected	classicFisher
GO:0007166	cell surface receptor linked signaling p...			55	14	0.9	6.6e-14
GO:0023033	signaling pathway			132	17	2.15	1.5e-11
GO:0050789	regulation of biological process			1444	51	23.52	4.3e-11
GO:0007186	G-protein coupled receptor protein signa...			37	10	0.6	1.7e-10
Network no. = 8
BT	UBP3	ZEO1	HSL1	CNB1	VPS45	PEP7
CAT	MON1	CCZ1
GO.ID	Term			Annotated	Significant	Expected	classicFisher
GO:0006944	cellular membrane fusion			74	13	0.64	1.1e-14
GO:0061025	membrane fusion			74	13	0.64	1.1e-14
GO:0007034	vacuolar transport			113	12	0.97	6.9e-11
GO:0006914	autophagy			131	12	1.12	4e-10
Network no. = 9
BT	BMH1	RCN2	ADE16	SAP155	SDS23	VPS35	PEP8	VPS17	SNX3	SNF4	HRK1	ROD1	FAR11	SNT2
CAT	ATG18	BIO3
GO.ID	Term			Annotated	Significant	Expected	classicFisher
GO:0042147	retrograde transport, endosome to Golgi			21	7	0.44	1.3e-07
GO:0006006	glucose metabolic process			113	13	2.36	4.4e-07
GO:0006974	response to DNA damage stimulus			282	20	5.9	9e-07
GO:0006334	nucleosome assembly			29	7	0.61	1.5e-06
Network no. = 10
BT	CSM1	DSE3	FRA1	VPS4	DID2	OSH6	FAR11	SNT2	ABP1	HUA2	PAC11	FKH1	YMR144W	LDB18	BSC5
CAT	ARP8	YLR072W
GO.ID	Term			Annotated	Significant	Expected	classicFisher
GO:0006323	DNA packaging			55	12	1.56	2.5e-08
GO:0006334	nucleosome assembly			29	9	0.82	5.6e-08
GO:0050789	regulation of biological process			1444	70	40.99	7e-08
GO:0071103	DNA conformation change			76	13	2.16	1.4e-07
Network no. = 11
BT	KAR9	KIP2	PEP1	PEP4	UBP3	ZEO1	LSM1	RPL41A	SSB1	SNL1	NFI1	ECM11
CAT	APA1	APA2
GO.ID	Term			Annotated	Significant	Expected	classicFisher
GO:0000226	microtubule cytoskeleton organization			111	9	1.25	2.9e-06
GO:0007017	microtubule-based process			126	9	1.41	8.3e-06
GO:0006997	nucleus organization			72	7	0.81	1.2e-05
GO:0006913	nucleocytoplasmic transport			153	9	1.72	4e-05
Network no. = 12
BT	GZF3	GAP1	DAL80	PSY3
CAT	PSY3	SHU1	SHU2
GO.ID	Term			Annotated	Significant	Expected	classicFisher
GO:0000725	recombinational repair			37	3	0.08	5.7e-05
GO:0006281	DNA repair			245	5	0.54	8.8e-05
GO:0006357	regulation of transcription from RNA pol...			256	5	0.56	0.00011
GO:0006807	nitrogen compound metabolic process			1849	10	4.07	0.00012
Network no. = 13
CAT	STE23	MRN1
GO.ID	Term			Annotated	Significant	Expected	classicFisher
GO:0007323	peptide pheromone maturation			6	1	0	0.0026
GO:0051604	protein maturation			39	1	0.02	0.0171
GO:0019236	response to pheromone			95	1	0.04	0.0414
GO:0010033	response to organic substance			145	1	0.06	0.0628
Network no. = 14
BT	FAR11	SNT2	FKH1	YMR144W
CAT	XBP1	SNT2
GO.ID	Term			Annotated	Significant	Expected	classicFisher
GO:0042147	retrograde transport, endosome to Golgi			21	2	0.06	0.0015
GO:0048522	positive regulation of cellular process			243	4	0.7	0.0039
GO:0048518	positive regulation of biological proces...			254	4	0.73	0.0046
GO:0006259	DNA metabolic process			422	5	1.21	0.0046
Network no. = 15
CAT	SPR1	EXG1
GO.ID	Term			Annotated	Significant	Expected	classicFisher
GO:0007047	cellular cell wall organization			201	2	0.09	0.0019
GO:0045229	external encapsulating structure organiz...			201	2	0.09	0.0019
GO:0071555	cell wall organization			201	2	0.09	0.0019
GO:0070882	cellular cell wall organization or bioge...			223	2	0.1	0.0024
Network no. = 16
CAT	ISN1	FMP41
GO.ID	Term			Annotated	Significant	Expected	classicFisher
GO:0043101	purine salvage			5	1	0	0.0022
GO:0009163	nucleoside biosynthetic process			6	1	0	0.0026
GO:0042455	ribonucleoside biosynthetic process			6	1	0	0.0026
GO:0042278	purine nucleoside metabolic process			17	1	0.01	0.0075
Network no. = 17
BT	CSM1	DSE3	FRA1	NAT1	NAT5	PCL1	HMS1	ABP1	HUA2	PAC11
CAT	RTT102	PCL9
GO.ID	Term			Annotated	Significant	Expected	classicFisher
GO:0006999	nuclear pore organization			34	8	0.46	9.1e-09
GO:0006609	mRNA-binding (hnRNP) protein import into...			27	7	0.36	4e-08
GO:0006408	snRNA export from nucleus			24	6	0.32	5.1e-07
GO:0006608	snRNP protein import into nucleus			24	6	0.32	5.1e-07
Network no. = 18
BT	HOG1	PTP3	PTP2	BMH1	RCN2	ADE16	CHS5	BCH2	NAT1	NAT5	SNF7	VPS24	BRO1	HSL1	CNB1	SNF4	HRK1	ROD1	RLM1	KDX1	SHO1	BUD8
CAT	HOG1	PTP3	PTP2	BMH1	RCN2	ISW1	IOC2
HQ	HOG1	TOK1	PTP2
GO.ID	Term			Annotated	Significant	Expected	classicFisher
GO:0050789	regulation of biological process			1444	106	60.06	1.6e-12
GO:0065007	biological regulation			1643	115	68.34	1.6e-12
GO:0051716	cellular response to stimulus			602	61	25.04	3.7e-12
GO:0070887	cellular response to chemical stimulus			125	25	5.2	2.2e-11
Network no. = 19
BT	PEP1	PEP4	LSM1	RPL41A	SHE2	LPP1
HQ	ZDS1	SNT1
GO.ID	Term			Annotated	Significant	Expected	classicFisher
GO:0032502	developmental process			432	10	2.19	2e-05
GO:0048869	cellular developmental process			373	9	1.89	4.4e-05
GO:0048583	regulation of response to stimulus			20	3	0.1	0.00012
GO:0006476	protein amino acid deacetylation			28	3	0.14	0.00034
Network no. = 20
BT	VPS52	VPS51	CHS5	BCH2	NAT1	NAT5	KRE2	DOS2	PEP1	PEP4	VPS45	PEP7	APL4	APM2	SHO1	BUD8
CAT	VPS52	VPS51	CHS5	BCH2	BCH1	KRE2	DOS2	GRX3	GRX4	VPS45	PEP7
HQ	CHS5	BCH2	BCH1
GO.ID	Term			Annotated	Significant	Expected	classicFisher
GO:0006892	post-Golgi vesicle-mediated transport			70	30	1.8	1e-30
GO:0016192	vesicle-mediated transport			354	47	9.11	4.1e-23
GO:0048193	Golgi vesicle transport			175	34	4.51	7.7e-22
GO:0006896	Golgi to vacuole transport			28	17	0.72	5e-21
Network no. = 21
BT	FBP1	MDH2	ABP1	HUA2	PAC11	SHO1	BUD8
CAT	ABP1	HUA2
HQ	PEX8	PEX17
GO.ID	Term			Annotated	Significant	Expected	classicFisher
GO:0030029	actin filament-based process			114	8	0.95	3.2e-06
GO:0048308	organelle inheritance			66	6	0.55	1.4e-05
GO:0030010	establishment of cell polarity			105	7	0.88	2e-05
GO:0030036	actin cytoskeleton organization			108	7	0.9	2.4e-05
Network no. = 22
BT	KRE2	DOS2
CAT	CHS5	BCH2	BCH1	KRE2	DOS2
HQ	KRE2	DOS2
GO.ID	Term			Annotated	Significant	Expected	classicFisher
GO:0006893	Golgi to plasma membrane transport			29	5	0.06	1.8e-09
GO:0006892	post-Golgi vesicle-mediated transport			70	6	0.15	2.2e-09
GO:0048193	Golgi vesicle transport			175	7	0.39	1.2e-08
GO:0016192	vesicle-mediated transport			354	8	0.78	4.9e-08
Network no. = 23
BT	CSM1	DSE3	FRA1	SXM1	YPR015C	SSB1	SNL1	ABP1	HUA2	PAC11
CAT	SNQ2	PDR11	MDY2	GET3	GET4	SGT2	PRE9	IRC25	SSB1	SNL1	ABP1	HUA2
HQ	SNQ2	PDR3
GO.ID	Term			Annotated	Significant	Expected	classicFisher
GO:0006999	nuclear pore organization			34	10	0.86	5.7e-09
GO:0006997	nucleus organization			72	12	1.82	1.7e-07
GO:0006609	mRNA-binding (hnRNP) protein import into...			27	8	0.68	2e-07
GO:0051641	cellular localization			714	40	18.07	2.8e-07
Network no. = 24
BT	HOG1	PTP3	PTP2	BMH1	RCN2	ADE16	HSL1	CNB1	SNF4	HRK1	ROD1	SSB1	SNL1	RED1	MEK1
CAT	HOG1	PTP3	PTP2	BMH1	RCN2	SSB1	SNL1
HQ	HSL1	HFA1
GO.ID	Term			Annotated	Significant	Expected	classicFisher
GO:0043687	post-translational protein modification			427	22	5.36	2.3e-09
GO:0006468	protein amino acid phosphorylation			134	13	1.68	5.8e-09
GO:0050789	regulation of biological process			1444	38	18.11	5.7e-08
GO:0006796	phosphate metabolic process			308	17	3.86	1e-07
Network no. = 25
BT	KAR9	KIP2	LEM3	DNF2	RCY1	CDC50	LSM1	RPL41A
CAT	LEM3	DNF2	RCY1	CDC50	YPT32
HQ	GYP1	YPT32
GO.ID	Term			Annotated	Significant	Expected	classicFisher
GO:0045332	phospholipid translocation			9	5	0.07	1.8e-09
GO:0034204	lipid translocation			10	5	0.07	3.6e-09
GO:0015914	phospholipid transport			18	5	0.13	1.2e-07
GO:0006869	lipid transport			39	5	0.28	7.1e-06
Network no. = 26
BT	BMH1	RCN2	ADE16	MYO3	SRL1	SHE2	LPP1	NFI1	ECM11
CAT	BMH1	RCN2	MYO3	SRL1
HQ	YAP1801	PPN1
GO.ID	Term			Annotated	Significant	Expected	classicFisher
GO:0030029	actin filament-based process			114	15	1.53	1e-11
GO:0032505	reproduction of a single-celled organism			202	18	2.71	5.3e-11
GO:0048869	cellular developmental process			373	23	5.01	1.1e-10
GO:0032502	developmental process			432	24	5.8	3.4e-10
Network no. = 27
BT	BMH1	RCN2	ADE16	SRN2	MVB12	SNF7	VPS24	BRO1	VPS36	VPS25	GZF3	GAP1	VPS4	DID2	OSH6	ABP1	HUA2	PAC11	MRP8	YLR179C
CAT	SRN2	VPS36	VPS28	MVB12	SNF7	VPS24	GZF3	GAP1	VPS4	DID2	OSH6
HQ	VPS4	OSH6
GO.ID	Term			Annotated	Significant	Expected	classicFisher
GO:0043162	ubiquitin-dependent protein catabolic pr...			19	14	0.44	5.4e-20
GO:0045324	late endosome to vacuole transport			35	13	0.81	2.4e-13
GO:0007034	vacuolar transport			113	19	2.61	4.5e-12
GO:0016197	endosome transport			62	14	1.43	6e-11
Network no. = 28
BT	CSM1	DSE3	FRA1	SXM1	YPR015C	MDV1	FIS1
CAT	CSM1	FRA1
HQ	URN1	AIM4
GO.ID	Term			Annotated	Significant	Expected	classicFisher
GO:0016559	peroxisome fission			8	5	0.05	4.9e-10
GO:0032990	cell part morphogenesis			12	5	0.08	6.8e-09
GO:0070584	mitochondrion morphogenesis			12	5	0.08	6.8e-09
GO:0000266	mitochondrial fission			6	4	0.04	2.3e-08
Network no. = 29
BT	VPS52	VPS51	CHS5	BCH2	VPS36	VPS25	VPS35	PEP8	VPS17	SNX3	PEP1	PEP4	RCY1	CDC50	VPS45	PEP7	SHE2	LPP1	FKH1	YMR144W
CAT	VPS52	VPS51	CHS5	BCH2	BCH1	SRN2	VPS36	VPS28	MVB12	VPS35	PEP8	PEP1	VPS17	VPS45	PEP7
HQ	TLG2	BTN2
GO.ID	Term			Annotated	Significant	Expected	classicFisher
GO:0051649	establishment of localization in cell			623	84	24.27	1.2e-28
GO:0016192	vesicle-mediated transport			354	64	13.79	2.8e-28
GO:0051641	cellular localization			714	88	27.81	2.7e-27
GO:0033036	macromolecule localization			673	84	26.22	3.7e-26
Network no. = 30
BT	FAR11	SNT2
CAT	THI2	THI3
HQ	THI2	THI3
GO.ID	Term			Annotated	Significant	Expected	classicFisher
GO:0009083	branched chain family amino acid catabol...			10	2	0.01	4.3e-05
GO:0000947	amino acid catabolic process to alcohol ...			11	2	0.01	5.3e-05
GO:0000955	amino acid catabolic process via Ehrlich...			11	2	0.01	5.3e-05
GO:0006772	thiamin metabolic process			13	2	0.01	7.5e-05
Network no. = 31
BT	KRE2	DOS2
CAT	KRE2	DOS2
HQ	PDA1	PKP1
GO.ID	Term			Annotated	Significant	Expected	classicFisher
GO:0044262	cellular carbohydrate metabolic process			275	3	0.3	0.002
GO:0005975	carbohydrate metabolic process			302	3	0.33	0.0026
GO:0006006	glucose metabolic process			113	2	0.12	0.0058
GO:0018202	peptidyl-histidine modification			6	1	0.01	0.0066
Network no. = 32
BT	BMH1	RCN2	ADE16	CSM1	DSE3	FRA1	MYO3	SRL1	SHO1	BUD8
CAT	BMH1	RCN2	CSM1	FRA1	MYO3	SRL1
HQ	UBP5	HOF1
GO.ID	Term			Annotated	Significant	Expected	classicFisher
GO:0000910	cytokinesis			114	15	1.4	2.7e-12
GO:0000003	reproduction			360	22	4.44	5.6e-11
GO:0033205	cytokinesis during cell cycle			70	11	0.86	4.4e-10
GO:0051301	cell division			339	20	4.18	1.1e-09
Network no. = 33
BT	LTP1	DIA3	SSB1	SNL1
CAT	ISW1	IOC2	LTP1	DIA3	SSB1	SNL1
HQ	LTP1	DIA3
GO.ID	Term			Annotated	Significant	Expected	classicFisher
GO:0006338	chromatin remodeling			73	4	0.21	3.9e-05
GO:0016568	chromatin modification			192	5	0.55	0.00012
GO:0006457	protein folding			98	4	0.28	0.00013
GO:0006325	chromatin organization			227	5	0.65	0.00028
Network no. = 34
BT	MYO3	SRL1	ABP1	HUA2	PAC11
CAT	OYE2	OYE3	MYO3	SRL1	ABP1	HUA2
HQ	MYO3	SRL1
GO.ID	Term			Annotated	Significant	Expected	classicFisher
GO:0030036	actin cytoskeleton organization			108	10	0.38	2.7e-13
GO:0030029	actin filament-based process			114	10	0.4	4.7e-13
GO:0051666	actin cortical patch localization			15	6	0.05	3.2e-12
GO:0006897	endocytosis			93	9	0.33	4.3e-12
Network no. = 35
HQ	GSY1	GLG1
GO.ID	Term			Annotated	Significant	Expected	classicFisher
GO:0005978	glycogen biosynthetic process			18	2	0.01	1.5e-05
GO:0009250	glucan biosynthetic process			29	2	0.01	3.9e-05
GO:0005977	glycogen metabolic process			31	2	0.01	4.5e-05
GO:0033692	cellular polysaccharide biosynthetic pro...			40	2	0.02	7.6e-05
Network no. = 36
BT	LST7	PUT3
CAT	PUT3	PSR1
HQ	PUT3	PSR1
GO.ID	Term			Annotated	Significant	Expected	classicFisher
GO:0006560	proline metabolic process			5	1	0	0.0033
GO:0009065	glutamine family amino acid catabolic pr...			12	1	0.01	0.0079
GO:0046700	heterocycle catabolic process			26	1	0.02	0.0171
GO:0006893	Golgi to plasma membrane transport			29	1	0.02	0.019
Network no. = 37
BT	CHS5	BCH2	SRN2	MVB12	VPS36	VPS25	PEP1	PEP4	GZF3	GAP1	LSM1	RPL41A	APL4	APM2	MYO3	SRL1	ABP1	HUA2	PAC11	UFD4	ILV6
CAT	CHS5	BCH2	BCH1	SRN2	VPS36	VPS28	MVB12	VPS35	PEP8	PEP1	VPS17	GZF3	GAP1	PRE9	IRC25	MYO3	SRL1	ABP1	HUA2	UFD4	ILV6
HQ	YAP1802	EDE1
GO.ID	Term			Annotated	Significant	Expected	classicFisher
GO:0051641	cellular localization			714	113	39.75	1.1e-29
GO:0051649	establishment of localization in cell			623	99	34.69	1.9e-25
GO:0033036	macromolecule localization			673	103	37.47	2.8e-25
GO:0016192	vesicle-mediated transport			354	71	19.71	1.1e-23
Network no. = 38
BT	BMH1	RCN2	ADE16	VPS36	VPS25	PCL1	HMS1
CAT	PCL1	HMS1	FOX2	PBY1
HQ	FOX2	ADH7
GO.ID	Term			Annotated	Significant	Expected	classicFisher
GO:0070887	cellular response to chemical stimulus			125	9	1.29	3.8e-06
GO:0000433	negative regulation of transcription fro...			5	3	0.05	1e-05
GO:0000437	negative regulation of transcription fro...			5	3	0.05	1e-05
GO:0006014	D-ribose metabolic process			5	3	0.05	1e-05
Network no. = 39
BT	LSM1	RPL41A
CAT	RAV1	RAV2
HQ	PXA2	PXA1
GO.ID	Term			Annotated	Significant	Expected	classicFisher
GO:0007035	vacuolar acidification			25	7	0.12	9.8e-12
GO:0045851	pH reduction			25	7	0.12	9.8e-12
GO:0051452	intracellular pH reduction			25	7	0.12	9.8e-12
GO:0030641	regulation of cellular pH			26	7	0.13	1.3e-11
Network no. = 40
BT	BMH1	RCN2	ADE16	ABP1	HUA2	PAC11
CAT	BMH1	RCN2	SIW14	EMI2	MPA43	ABP1	HUA2
HQ	YCP4	PST2
GO.ID	Term			Annotated	Significant	Expected	classicFisher
GO:0030029	actin filament-based process			114	9	0.95	2.5e-07
GO:0051049	regulation of transport			134	9	1.12	1e-06
GO:0032879	regulation of localization			143	9	1.2	1.8e-06
GO:0030036	actin cytoskeleton organization			108	8	0.9	2.1e-06
Network no. = 41
HQ	FZF1	LYS5
GO.ID	Term			Annotated	Significant	Expected	classicFisher
GO:0018065	protein-cofactor linkage			5	1	0	0.0022
GO:0019878	lysine biosynthetic process via aminoadi...			8	1	0	0.0035
GO:0006553	lysine metabolic process			9	1	0	0.004
GO:0009085	lysine biosynthetic process			9	1	0	0.004
